# Supplementary material for: The role of Na+ in catalysis by the 8–17 DNAzyme
Source: Royal Society of Chemistry journal article supplement (doi:10.1039/d2ob01075e), 2022-01-01
Supplement: d2ob01075e2.pdf [file d2ob01075e2.pdf]

## Supporting Information

### **The role of Na<sup>+</sup> in Catalysis by the 8-17 DNAzyme**

Virginia Parra-Meneses. Francisca Rojas-Hernández. Marjorie Cepeda-Plaza\*  
*Chemical Sciences Department. Universidad Andres Bello. Santiago. Chile*

**Table S1.**  $k_{obs}$  values measured in presence of 100  $\mu\text{M Pb}^{2+}$  and 25  $\mu\text{M Pb}^{2+}$  at pH 5.5 and 20 mM  $\text{Mg}^{2+}$  at pH 7.0 as a function of the concentration of  $\text{Na}^+$ . The activity with each divalent cofactor was measured under different pH conditions considering the ability of each cation to activate de 8-17 DNAzyme. Data plotted in Figure 3 and Figures S1.

| $[\text{Na}^+]$<br>(mM) | $k_{obs}$<br>100 $\mu\text{M Pb}^{2+}$<br>( $\text{min}^{-1}$ ) | $[\text{Na}^+]$<br>(mM) | $k_{obs}$<br>25 $\mu\text{M Pb}^{2+}$<br>( $\text{min}^{-1}$ ) | $[\text{Na}^+]$<br>(mM) | $k_{obs}$<br>20 mM $\text{Mg}^{2+}$<br>( $\text{min}^{-1}$ ) |
|-------------------------|-----------------------------------------------------------------|-------------------------|----------------------------------------------------------------|-------------------------|--------------------------------------------------------------|
| 12.7                    | 0.207                                                           | 9.8                     | 0.009                                                          | 20.3                    | 0.249                                                        |
| 24.5                    | 0.403                                                           | 15.3                    | 0.048                                                          | 24.7                    | 0.200                                                        |
| 26.5                    | 0.592                                                           | 21.7                    | 0.246                                                          | 34.6                    | 0.274                                                        |
| 32.3                    | 1.479                                                           | 31.4                    | 0.374                                                          | 39.1                    | 0.228                                                        |
| 32.7                    | 1.014                                                           | 32.8                    | 1.013                                                          | 48.1                    | 0.219                                                        |
| 34.1                    | 1.102                                                           | 43.2                    | 1.157                                                          | 58.5                    | 0.214                                                        |
| 38.9                    | 1.639                                                           | 48.8                    | 1.309                                                          | 78.3                    | 0.261                                                        |
| 44.6                    | 2.479                                                           | 55.4                    | 2.293                                                          | 92.7                    | 0.340                                                        |
| 48.6                    | 2.800                                                           | 62.3                    | 1.964                                                          | 105.3                   | 0.238                                                        |
| 52.1                    | 3.628                                                           | 63.8                    | 1.985                                                          | 123.0                   | 0.209                                                        |
| 56.7                    | 4.091                                                           | 72.7                    | 2.331                                                          | 135.3                   | 0.189                                                        |
| 66.2                    | 4.447                                                           | 83.8                    | 2.116                                                          |                         |                                                              |
| 74.6                    | 5.673                                                           | 88.6                    | 2.556                                                          |                         |                                                              |
| 83.3                    | 6.181                                                           | 93.1                    | 2.139                                                          |                         |                                                              |
| 99.6                    | 5.886                                                           | 99.6                    | 1.617                                                          |                         |                                                              |
| 103.1                   | 5.613                                                           | 103.4                   | 1.690                                                          |                         |                                                              |
| 110.4                   | 5.048                                                           | 108.0                   | 1.202                                                          |                         |                                                              |
| 123.4                   | 5.984                                                           | 110.4                   | 1.747                                                          |                         |                                                              |
| 128.7                   | 5.179                                                           | 128.7                   | 1.287                                                          |                         |                                                              |
| 142.9                   | 5.2834                                                          | 139.7                   | 1.371                                                          |                         |                                                              |
| 149.9                   | 4.77149                                                         | 148.4                   | 1.029                                                          |                         |                                                              |
| 151.2                   | 5.00921                                                         | 156.0                   | 1.083                                                          |                         |                                                              |
| 156.9                   | 4.71546                                                         |                         |                                                                |                         |                                                              |
| pH 5.5                  |                                                                 |                         |                                                                | pH 7.0                  |                                                              |

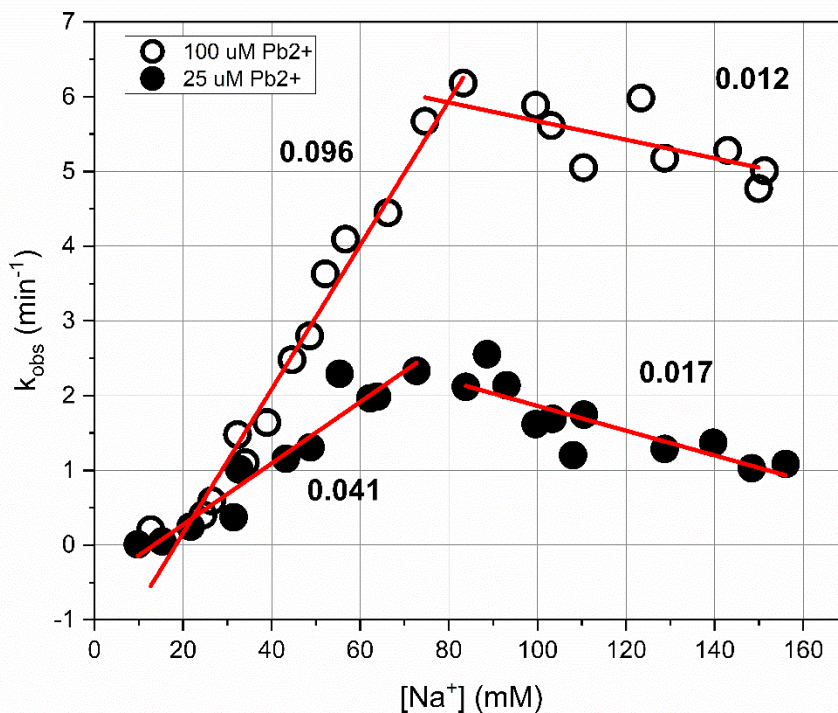

**Figure S1.** Influence of  $\text{Na}^+$  concentration on the activity of the 8-17 DNAzyme with  $100 \mu\text{M}$  (open circles) and  $25 \mu\text{M}$   $\text{Pb}^{2+}$  (black circles) at pH 5.5. Linear fittings are shown in red lines. Slopes are indicated in bold in each portion of the graph. Linear trend analysis of each portion are shown from Table S2-S5.

**Table S2.** Linear trend analysis of the 8-17 activity measured in presence of  $100 \mu\text{M}$   $\text{Pb}^{2+}$ . The fitting covers the region of  $\text{Na}^+$  concentrations lower than 80 mM displayed in Figure S1. Data are informed as presented by Origin 8.5 software.

|                         |                        |
|-------------------------|------------------------|
| Equation                | $y = a + b \cdot x$    |
| Intercept               | $-1.77425 \pm 0.23777$ |
| Slope                   | $0.09649 \pm 0.00487$  |
| Residual Sum of Squares | 1.49607                |
| Pearson's r             | 0.98508                |
| R-Square (COD)          | 0.97037                |
| Adj. R-Square           | 0.9679                 |

**Table S3.** Linear trend analysis of the 8-17 activity measured in presence of 100  $\mu\text{M}$   $\text{Pb}^{2+}$ . The fitting covers de region of  $\text{Na}^+$  concentrations higher than 80 mM displayed in Figure S1. Data are informed as presented by Origin 8.5 software.

|                         |                        |
|-------------------------|------------------------|
| Equation                | $y = a + b*x$          |
| Intercept               | $6.91751 \pm 0.5893$   |
| Slope                   | $-0.01244 \pm 0.00511$ |
| Residual Sum of Squares | 0.95844                |
| Pearson's r             | -0.67754               |
| R-Square (COD)          | 0.45906                |
| Adj. R-Square           | 0.38178                |

**Table S4.** Linear trend analysis of the 8-17 activity measured in presence of 25  $\mu\text{M}$   $\text{Pb}^{2+}$ . The fitting covers de region of  $\text{Na}^+$  concentrations lower than 80 mM displayed in Figure S1. Data are informed as presented by Origin 8.5 software.

|                         |                        |
|-------------------------|------------------------|
| Equation                | $y = a + b*x$          |
| Intercept               | $-0.55076 \pm 0.17695$ |
| Slope                   | $0.0411 \pm 0.00384$   |
| Residual Sum of Squares | 0.58449                |
| Pearson's r             | 0.96297                |
| R-Square (COD)          | 0.9273                 |
| Adj. R-Square           | 0.91923                |

**Table S5.** Linear trend analysis of the 8-17 activity measured in presence of 25  $\mu\text{M}$   $\text{Pb}^{2+}$ . The fitting covers de region of  $\text{Na}^+$  concentrations higher than 80 mM displayed in Figure S1. Data are informed as presented by Origin 8.5 software.

|                         |                        |
|-------------------------|------------------------|
| Equation                | $y = a + b*x$          |
| Intercept               | $3.51909 \pm 0.41488$  |
| Slope                   | $-0.01657 \pm 0.00355$ |
| Residual Sum of Squares | 0.70042                |
| Pearson's r             | -0.84139               |
| R-Square (COD)          | 0.70794                |
| Adj. R-Square           | 0.67548                |

**Table S6.**  $k_{obs}$  values of the 8-17 G14-AP variant measured at different pHs in presence of 100  $\mu\text{M}$   $\text{Pb}^{2+}$ . Data at 100 mM  $\text{Na}^+$  were extracted from reference 18. The results were fitted to equations 2.

| pH                                 | $k_{obs}$            |                     |
|------------------------------------|----------------------|---------------------|
|                                    | 100 mM $\text{Na}^+$ | 25 mM $\text{Na}^+$ |
| 5.0                                | 0.0775               | 0.0223              |
| 5.5                                | 0.1728               | 0.0839              |
| 6.0                                | 0.1835               | 0.1251              |
| 6.5                                | 0.2340               | 0.1327              |
| 7.0                                | 0.1439               | 0.0726              |
| 7.5                                | 0.0569               | 0.0425              |
| 8                                  | 0.0298               | 0.0088              |
| 100 $\mu\text{M}$ $\text{Pb}^{2+}$ |                      |                     |

**Table S7.** Fitting parameters obtained from the pH-rate profile of the 8-17 G14AP variant measured in presence of 100  $\mu\text{M}$   $\text{Pb}^{2+}$  and 25 mM  $\text{Na}^+$ . Data are informed as displayed by Origin 8.5 software.

|                 |                                 |
|-----------------|---------------------------------|
| Equation        | $k/(1+10^{(A1-x)}+10^{(x-A2)})$ |
| A1              | $5.79737 \pm 0.14854$           |
| A2              | $6.72515 \pm 0.14233$           |
| k               | $0.2328 \pm 0.04005$            |
| Reduced Chi-Sqr | 7.42434E-5                      |
| R-Square (COD)  | 0.97869                         |
| Adj. R-Square   | 0.96804                         |

**Table S8.** Fitting parameters obtained from the pH-rate profile of the 8-17 G14AP variant measured in presence of 100  $\mu\text{M}$   $\text{Pb}^{2+}$  and 100 mM  $\text{Na}^+$ . Data are informed as displayed by Origin 8.5 software.

|                 |                                 |
|-----------------|---------------------------------|
| Equation        | $k/(1+10^{(A1-x)}+10^{(x-A2)})$ |
| A1              | $5.41746 \pm 0.19391$           |
| A2              | $7.00626 \pm 0.18191$           |
| k               | $0.2912 \pm 0.04693$            |
| Reduced Chi-Sqr | 5.09052E-4                      |
| R-Square (COD)  | 0.93982                         |
| Adj. R-Square   | 0.90973                         |
